# Supplementary material
Source: publisher figshare collection journal article supplement (https://acs.figshare.com/ndownloader/files/3793273)
Supplement: Supplementary file 1 [file 3793273]

## Supporting Information

### Effects of *Cudrania tricuspidata* Fruit Extract and Its Active Compound, 5,7,3',4'-Tetrahydroxy-6,8-diprenylisoflavone, on the High-Affinity IgE Receptor-Mediated Activation of Syk in Mast Cells

Taehun Lee,<sup>†</sup> Jaeyoung Kwon,<sup>§</sup> Dongho Lee,<sup>\*,§</sup> and Woongchon Mar<sup>\*,†</sup>

<sup>†</sup>Natural Products Research Institute, College of Pharmacy, Seoul National University, Seoul 151-742, Republic of Korea

<sup>§</sup>Department of Biosystems and Biotechnology, Korea University, Seoul 136-713, Republic of Korea

Corresponding authors

\*(W.M.) Phone: +82-2-880-2473. Fax: +82-2-888-9122. E-mail: mars@snu.ac.kr

\*(D.L.) Phone: +82-2-3290-3017. Fax: +82-2-953-0737. E-mail: [dongholee@korea.ac.kr](mailto:dongholee@korea.ac.kr)

**Figure S1.**

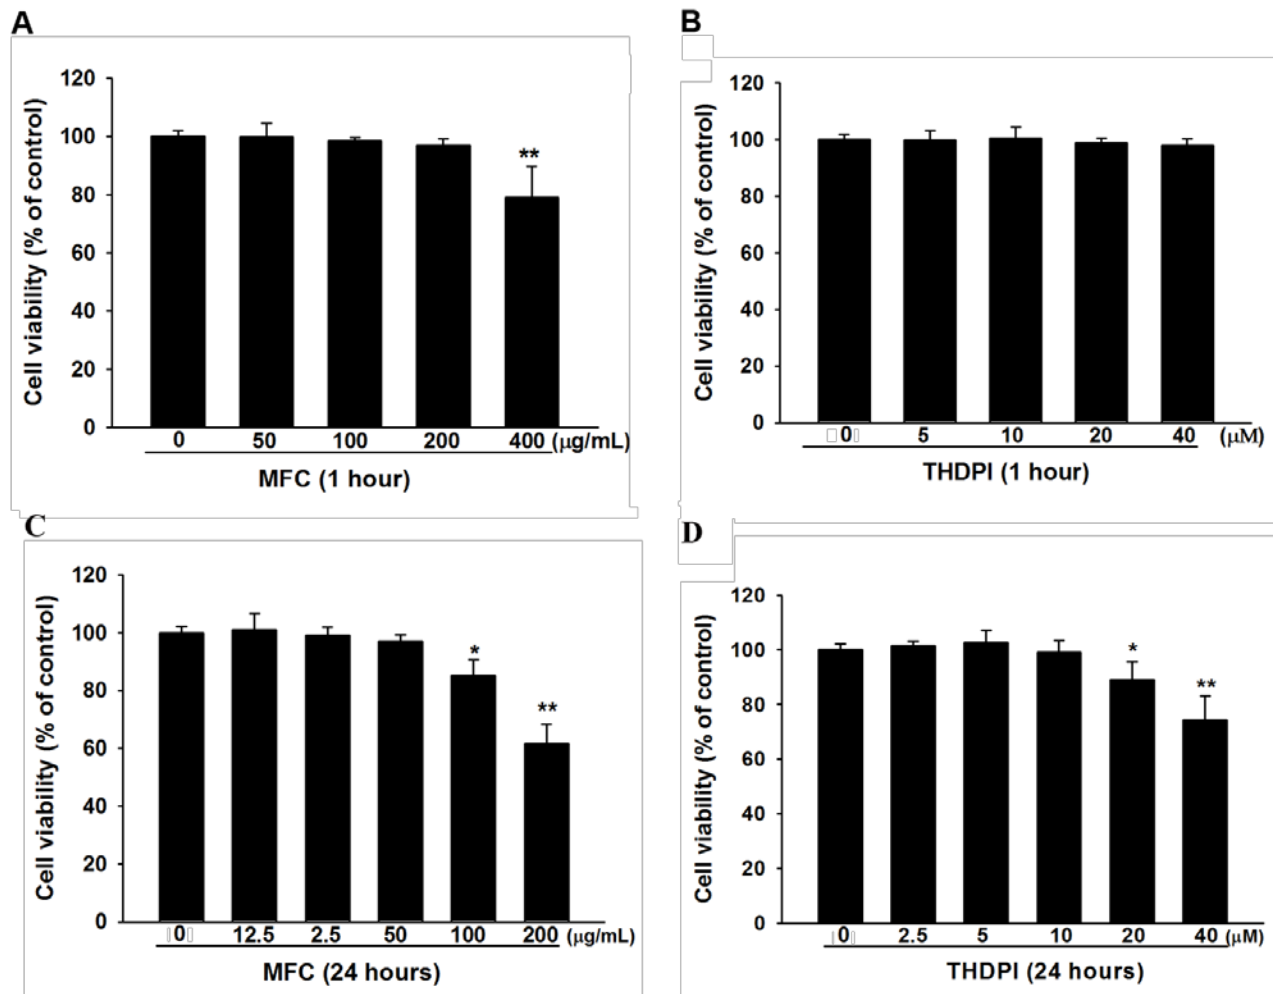

**Figure S1.** Cytotoxic effects of MFC and THDPI isolated on RBL-2H3 cells. RBL-2H3 cells were treated with various concentrations of MFC and THDPI for 1 h or 24 h, and cell viability was determined by MTT assay. Data represent the mean  $\pm$  S.D. of three independent experiments, \*  $p < 0.05$ , \*\*  $p < 0.01$ , compared with non-MFC or THDPI-treated cells.

### **Measurement of cytotoxic effect**

MTT (3-(4,5-Dimethylthiazol-2-yl)-2,5-diphenyltetrazolium bromide) assay was conducted to examine cell viability. RBL-2H3 cells ( $1 \times 10^5$  cells/100  $\mu$ L/well) were cultured in 96-well plates for 24 h at 37°C. The cells were treated with various concentrations of MFC or THDPI for 1 h or 24 h and medium was replaced with MTT dissolved in phenol-red free medium (250  $\mu$ g/mL) and incubated for 4 h at 37°C. The medium was carefully discarded and formazan was resuspended in 200  $\mu$ L of dimethyl sulfoxide (DMSO). The absorbance was measured at 595 nm using a microplate reader. Values measured non-MFC or THDPI-treated cells were considered to represent 100% viability.

**Figure S2**

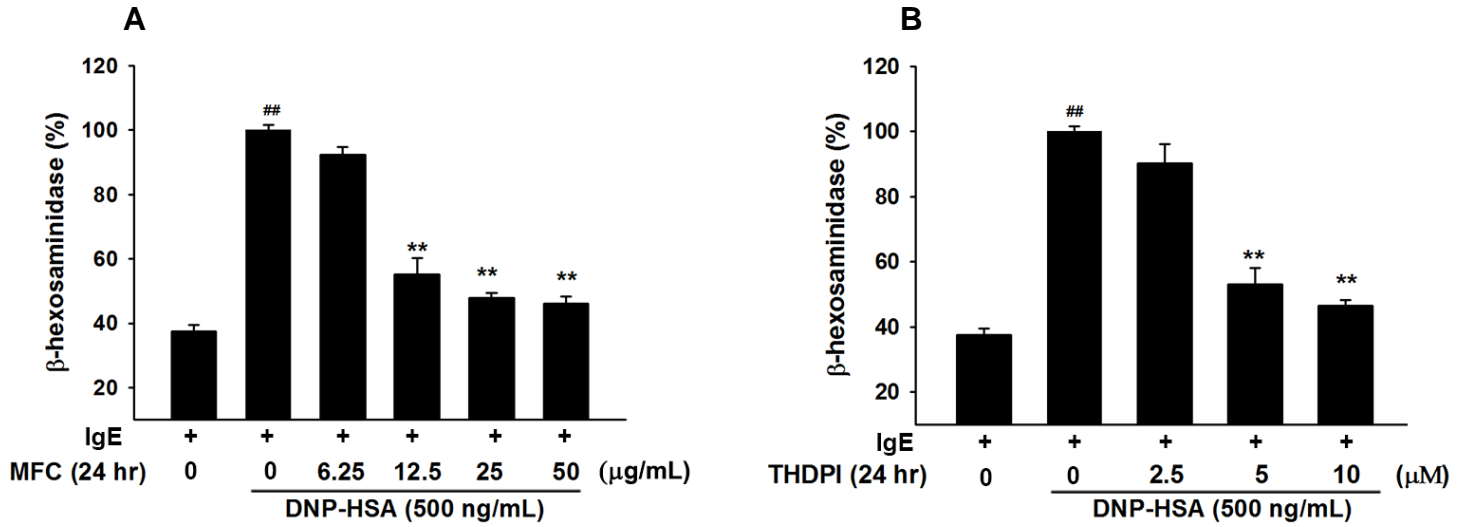

**Figure S2.** Effect of MFC and THDPI on the mast cell degranulation in RBL-2H3 cells. Anti-DNP IgE-sensitized cells were treated with various concentrations of MFC (A) and THDPI (B) for 24 h followed by antigen stimulation (DNP-HSA) for an additional 1 h. The release of  $\beta$ -hexosaminidase from cells treated with IgE/DNP-HSA was considered to represent 100% degranulation. Data represent the mean  $\pm$  SD of three independent experiments,  $^{##}p < 0.01$ , compared with IgE-sensitized cells without DNP-HSA;  $^{**}p < 0.01$ , compared with IgE/DNP-HSA-treated cells.
